# Supplementary material
Source: Springer Nature journal article supplement (https://www.springermedizin.de/resource/supplementary/13054_2010_8799_MOESM2_ESM.pdf/9732596)

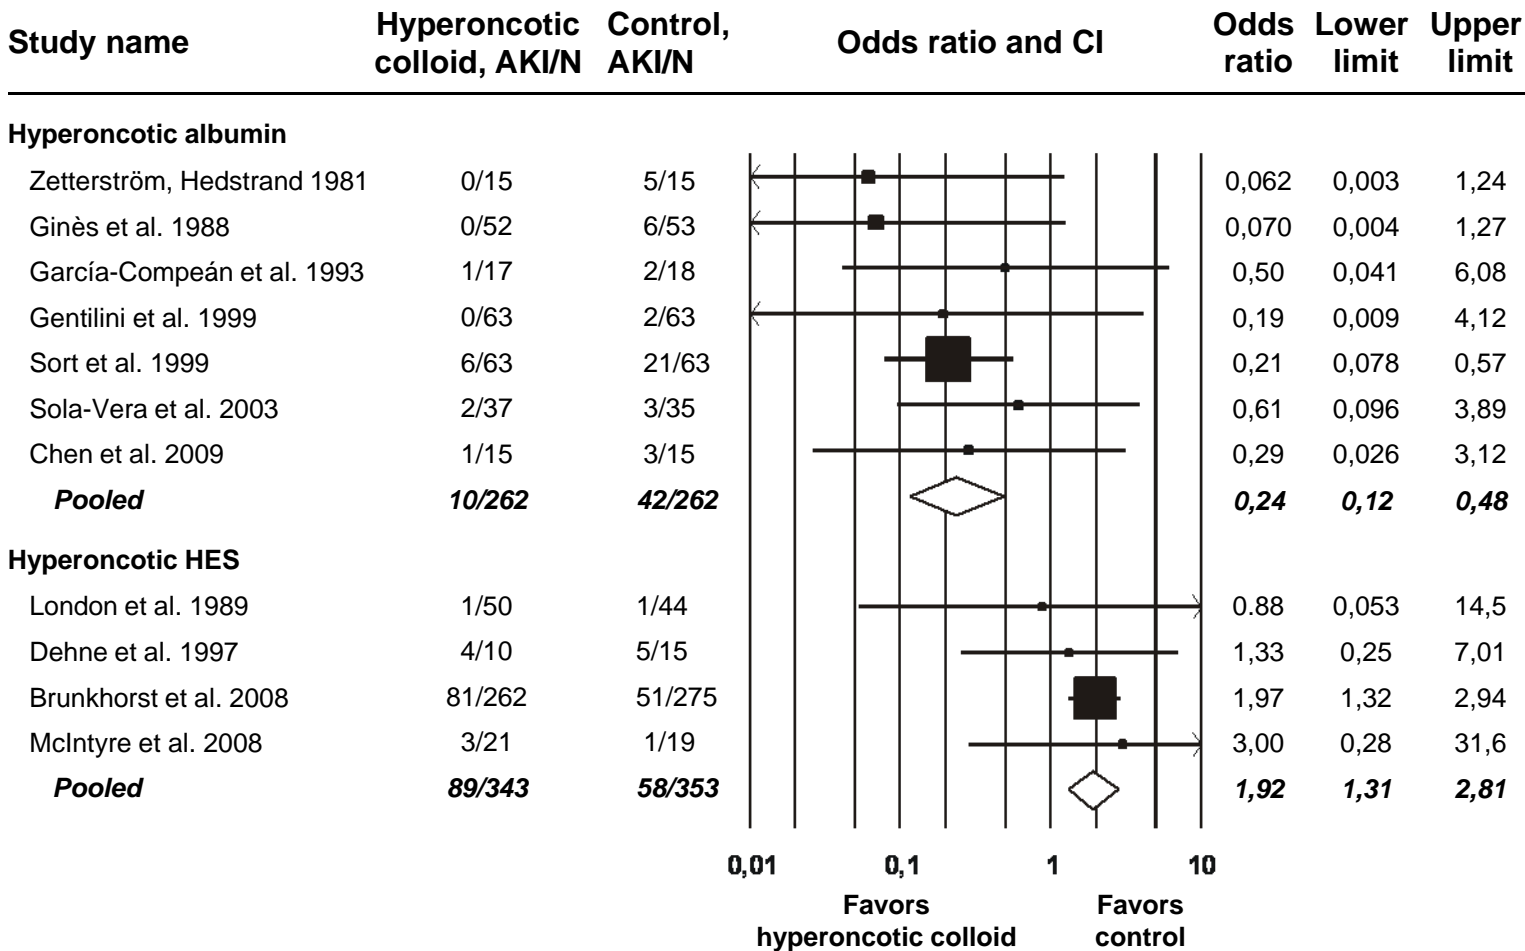

Supplement: MOESM2 [file 9732596]
